# Supplementary material for: Discovery of novel INK4C small-molecule inhibitors to promote human and murine hematopoietic stem cell ex vivo expansion
Source: PubMed Central journal article supplement (PMC4683533; doi:10.1038/srep18115), 2015-12-18
Supplement: srep18115-s1.pdf [file srep18115-s1.pdf]

1 **Supporting Information**

2 **Discovery of novel INK4C small-molecule inhibitors to promote human and murine**  
3 **hematopoietic stem cell *ex vivo* expansion**

4 *Xiang-Qun Xie<sup>1,3,\*</sup>, Peng Yang<sup>1,3</sup>, Yu Zhang<sup>2,3</sup>, Peng Zhang<sup>1</sup>, Liping Wang<sup>1</sup>, Yahui Ding<sup>2</sup>, Ming*  
5 *Yang<sup>2</sup>, Qin Tong<sup>1</sup>, Haizi Cheng<sup>1</sup>, Qing Ji<sup>2</sup>, Terence McGuire<sup>1</sup>, Weiping Yuan<sup>2</sup>, Tao Cheng<sup>2,\*</sup> and*  
6 *Yingdai Gao<sup>2,\*</sup>*

7 <sup>1</sup>Department of Pharmaceutical Sciences and Computational Chemical Genomics Screening  
8 Center, School of Pharmacy; NIH National Center of Excellence for Computational Drug Abuse  
9 Research; Drug Discovery Institute; Department of Computational Biology and Structural  
10 Biology, School of Medicine, University of Pittsburgh, Pittsburgh, Pennsylvania 15260, United  
11 States.

12 <sup>2</sup>Key Laboratory of Experimental Hematology, Institute of Hematology and Blood Diseases  
13 Hospital, Chinese Academy of Medical Sciences and Peking Union Medical College, Tianjin  
14 300020, P. R. China.

15 <sup>3</sup> These authors contributed equally to this work.

16  
17  
18 \* Correspondence and requests for materials should be addressed:

19 Xiang-Qun Xie, e-mail: [xix15@pitt.edu](mailto:xix15@pitt.edu);

20 Tao Cheng, e-mail: [chengtao@ihcams.ac.cn](mailto:chengtao@ihcams.ac.cn) and

21 Yingdai Gao, e-mail: [ydgao@ihcams.ac.cn](mailto:ydgao@ihcams.ac.cn)

## 22 **Methods**

23 **Chemistry.** All reagents were purchased from commercial sources and used without further  
24 purification. Analytical thin-layer chromatography (TLC) was performed on SiO<sub>2</sub> plates on  
25 alumina. Visualization was accomplished by UV irradiation at 254 nm. Flash column  
26 chromatography was performed using the Biotage Isolera flash purification system with SiO<sub>2</sub> 60  
27 (particle size 0.040–0.055 mm, 230–400 mesh). <sup>1</sup>H NMR was recorded on a Bruker 400 MHz  
28 spectrometer. Splitting patterns are indicated as follows: s, singlet; d, doublet; t, triplet; m,  
29 multiplet; br, broad peak. Purity of all final derivatives for biological testing was confirmed to be  
30 > 95%, as determined by the following conditions: a Shimadzu HPLC instrument with a  
31 Hamilton reversed phase column (HxSil, C18, 3 μm, 2.1 mm × 50 mm (H2)); eluent A  
32 consisting of 5% CH<sub>3</sub>CN in H<sub>2</sub>O; eluent B consisting of 90% CH<sub>3</sub>CN in H<sub>2</sub>O; flow rate of 0.2  
33 mL / min; UV detection, 254 and 214 nm.

34 **General procedure for synthesis of lactone intermediate.** To a mixture of an appropriate  
35 phenol and a β-keto ester in a 1:1.5 molar ratio was slowly added excess H<sub>2</sub>SO<sub>4</sub> (98%) within 1 h  
36 at 0 °C. The mixture was stirred at room temperature until the reaction was complete, as  
37 monitored by TLC. The mixture was poured into ice-water and allowed to stand overnight. The  
38 precipitated solid was filtered, washed with water until neutral, and dried *in vacuo* to prepare the  
39 product<sup>1</sup>.

40 **Synthesis of 4-(acetylamine)-benzenesulfonyl chloride intermediate.** 4.56 g (2.6 mL, 39.14  
41 mmol) of chlorosulfonic acid was slowly added to 1.0 g (7.40 mmol) of *N*-phenyl-acetamide.  
42 The resulting mixture was stirred and heated at 60 °C for 30 min. After cooling, the 4-  
43 (acetylamine)-benzenesulfonyl chloride was filtered through a Buckner funnel, washed twice

44 with 50 mL of water, and recovered as a white hygroscopic powder in 85% yield. The product  
45 was used in the next step without further purification.

46 **General procedure of coupling reaction between sulfonyl chlorides and substituted phenols.**

47 A cooled solution of 4-acetamidobenzene-1-sulfonyl chloride (466 mg, 2.0mmol) in THF (10  
48 mL) was treated with 7-hydroxy-4-methyl-2H-chromen-2-one (352 mg, 2.0mmol) followed by  
49 triethylamine (243 mg, 2.4 mmol). The reaction mixture was permitted to warm to room  
50 temperature and stirred for 12 h. The reaction mixture was filtered and the filtrate was  
51 concentrated. The residue was purified by Combi-flash column, providing the desired product,  
52 XIE18-6 (356 mg, 48%).

53 **General procedure of coupling reaction between sulfonyl chlorides and substituted amines.**

54 4-Acetamidobenzene-1-sulfonyl chloride (466 mg, 2.0 mmol) and methyl (*R*)-2-amino-2-  
55 phenylacetate (403 mg, 2.0 mmol) were dissolved in 20 mL of water. The mixture was added  
56 with K<sub>2</sub>CO<sub>3</sub> (414 mg, 3.0 mmol) and stirred at room temperature for 12 h. The precipitated solid  
57 was filtered, washed with water, and dried *in vacuo* to obtain the crude product, which was  
58 recrystallized in ethanol to prepare the final component, compound **22** (368 mg, 46%). <sup>1</sup>H NMR  
59 (400 MHz, DMSO-*d*<sub>6</sub>): 10.25 (s, 1H), 8.77 (s, 1H), 7.65-7.74 (m, 4H), 7.28-7.34 (m, 5H), 4.97 (s,  
60 1H), 3.45 (s, 3H), 2.08 (s, 3H). HPLC-MS (ESI): *m/z* 363.0 (M+H)<sup>+</sup>.

61 2-Oxo-2H-chromen-7-yl 4-acetamidobenzenesulfonate (**1**). Yield: 52%. <sup>1</sup>H NMR (400 MHz,  
62 DMSO-*d*<sub>6</sub>) δ 10.51 (s, 1H), 8.05 (d, *J* = 9.6 Hz, 1H), 7.82–7.86 (m, 4H), 7.75 (d, *J* = 8.8 Hz, 1H),  
63 7.12 (d, *J* = 2.4 Hz, 1H), 7.02-7.04 (m, 1H), 6.51 (d, *J* = 9.6 Hz, 1H), 2.11 (s, 3H). LC-MS (ESI):  
64 *m/z* 360.0 (M + H)<sup>+</sup>.

65 4-Isopropyl-2-oxo-2H-chromen-7-yl 4-acetamidobenzenesulfonate (**2**). Yield: 81%. <sup>1</sup>H NMR  
66 (400 MHz, DMSO-*d*<sub>6</sub>): 10.51 (s, 1H), 7.93 (d, *J* = 8.8 Hz, 1H), 7.85 (s, 4H), 7.12 (d, *J* = 2.4 Hz,  
67 1H), 7.04-7.07 (m, 1H), 6.35 (s, 1H), 3.30-3.32 (m, 1H), 2.11 (s, 3H), 1.24 (d, *J* = 6.8 Hz, 6H).  
68 HPLC-MS (ESI): *m/z* 402.1 (M+H)<sup>+</sup>.

69 *N*-(4-(*N*-phenethylsulfamoyl)phenyl)acetamide (**3**). Yield: 65%. <sup>1</sup>H NMR (400 MHz, DMSO-*d*<sub>6</sub>)  
70 δ 6.93 (d, *J* = 9.6 Hz, 4H), 6.31-6.46 (m, 5H), 2.28 (t, *J* = 7.6 Hz, 2H), 1.92 (t, *J* = 7.6 Hz, 2H),  
71 1.36 (s, 3H). LC-MS (ESI): *m/z* 319.0 (M + H)<sup>+</sup>.

72 *N*-(4-(*N*-(4-fluorophenethyl)sulfamoyl)phenyl)acetamide (**4**). Yield: 32%. <sup>1</sup>H NMR (400 MHz,  
73 DMSO-*d*<sub>6</sub>) δ 6.94 (s, 4H), 6.32-6.35 (m, 2H), 6.14-6.18 (m, 2H), 2.27 (t, *J* = 7.2 Hz, 2H), 1.92 (t,  
74 *J* = 7.2 Hz, 2H), 1.36 (s, 3H). LC-MS (ESI): *m/z* 337.1 (M + H)<sup>+</sup>.

75 *N*-(4-(*N*-benzylsulfamoyl)phenyl)acetamide (**5**). Yield: 55%. <sup>1</sup>H NMR (400 MHz, DMSO-*d*<sub>6</sub>) δ  
76 10.30 (s, 1H), 8.00 (t, *J* = 6.4 Hz, 1H), 7.72-7.77 (m, 4H), 7.21-7.31 (m, 5H), 3.96 (d, *J* = 6.0 Hz,  
77 2H), 2.10 (s, 3H). LC-MS (ESI): *m/z* 305.2 (M + H)<sup>+</sup>.

78 *N*-(4-(*N*-(3,4-dichlorobenzyl)sulfamoyl)phenyl)acetamide (**6**). Yield: 32%. <sup>1</sup>H NMR (400 MHz,  
79 DMSO-*d*<sub>6</sub>) δ 10.30 (s, 1H), 8.12 (t, *J* = 6.4 Hz, 1H), 7.68-7.75 (m, 4H), 7.23-7.55 (m, 3H), 3.99  
80 (d, *J* = 6.4 Hz, 2H), 2.09 (s, 3H). LC-MS (ESI): *m/z* 372.9 (M + H)<sup>+</sup>.

81 *N*-(4-(*N*-(4-(diethylamino)benzyl)sulfamoyl)phenyl)acetamide (**7**). Yield: 60%. <sup>1</sup>H NMR (400  
82 MHz, DMSO-*d*<sub>6</sub>) δ 10.28 (s, 1H), 7.69-7.75 (m, 5H), 6.97 (d, *J* = 8.4 Hz, 2H), 6.52 (d, *J* = 8.4  
83 Hz, 2H), 3.79 (d, *J* = 6.0 Hz, 2H), 3.28-3.35 (m, 4H), 2.09 (s, 3H), 1.05 (t, *J* = 6.8 Hz, 6H). LC-  
84 MS (ESI): *m/z* 376.1 (M + H)<sup>+</sup>.

85 *N*-(4-(*N*-(4-bromophenyl)sulfamoyl)phenyl)acetamide (**8**). Yield: 71%. <sup>1</sup>H NMR (400 MHz,  
86 DMSO-*d*<sub>6</sub>) δ 10.28 (s, 1H), 7.67-7.73 (m, 4H), 7.46 (d, *J* = 8.4 Hz, 2H), 7.21 (d, *J* = 8.8 Hz, 2H),  
87 3.91 (s, 2H), 2.09 (s, 3H). LC-MS (ESI): *m/z* 382.8 (M + H)<sup>+</sup>.

88 *N*-(4-(*N*-phenylsulfamoyl)phenyl)acetamide (**9**). Yield: 53%. <sup>1</sup>H NMR (400 MHz, DMSO-*d*<sub>6</sub>) δ  
89 10.28 (s, 1H), 10.14 (s, 1H), 7.66-7.71 (m, 4H), 6.99-7.24 (m, 5H), 2.06 (s, 3H). LC-MS (ESI):  
90 *m/z* 291.1 (M + H)<sup>+</sup>.

91 *N*-(4-(*N*-(*p*-tolyl)sulfamoyl)phenyl)acetamide (**10**). Yield: 47%. <sup>1</sup>H NMR (400 MHz, DMSO-*d*<sub>6</sub>)  
92 δ 10.27 (s, 1H), 9.96 (s, 1H), 7.63-7.69 (m, 4H), 7.02 (d, *J* = 8.4 Hz, 2H), 6.95 (d, *J* = 8.4 Hz,  
93 2H), 2.18 (s, 3H), 2.06 (s, 3H). LC-MS (ESI): *m/z* 305.2 (M + H)<sup>+</sup>.

94 *N*-(4-(*N*-(*o*-tolyl)sulfamoyl)phenyl)acetamide (**11**). Yield: 15%. <sup>1</sup>H NMR (400 MHz, DMSO-*d*<sub>6</sub>)  
95 δ 10.27 (s, 1H), 9.97 (s, 1H), 7.63-7.69 (m, 4H), 7.02 (d, *J* = 8.4 Hz, 2H), 6.95 (d, *J* = 8.4 Hz,  
96 2H), 2.18 (s, 3H), 2.06 (s, 3H). LC-MS (ESI): *m/z* 305.1 (M + H)<sup>+</sup>.

97 *N*-(4-(*N*-(4-chlorophenyl)sulfamoyl)phenyl)acetamide (**12**). Yield: 3.0%. <sup>1</sup>H NMR (400 MHz,  
98 DMSO-*d*<sub>6</sub>) δ 10.31 (s, 1H), 10.30 (s, 1H), 7.66-7.72 (m, 4H), 7.28 (d, *J* = 8.4 Hz, 2H), 7.08 (d, *J*  
99 = 8.8 Hz, 2H), 2.06 (s, 3H). LC-MS (ESI): *m/z* 325.1 (M + H)<sup>+</sup>.

100 *N*-(4-(*N*-(4-(dimethylamino)phenyl)sulfamoyl)phenyl)acetamide (**13**). Yield: 35%. <sup>1</sup>H NMR  
101 (400 MHz, DMSO-*d*<sub>6</sub>) δ 10.27 (s, 1H), 9.52 (s, 1H), 7.67 (d, *J* = 8.8 Hz, 2H), 7.57 (d, *J* = 8.8 Hz,  
102 2H), 6.85 (d, *J* = 8.8 Hz, 2H), 6.60 (d, *J* = 8.8 Hz, 2H), 2.82 (s, 6H), 2.07 (s, 3H). LC-MS (ESI):  
103 *m/z* 334.1 (M + H)<sup>+</sup>.

104 *N*-(4-(*N*-(2-fluoro-5-(trifluoromethyl)phenyl)sulfamoyl)phenyl)acetamide (**14**). Yield: 17%. <sup>1</sup>H  
105 NMR (400 MHz, MeOD) δ 7.77-7.89 (m, 5H), 7.32-7.48 (m, 2H), 2.21 (s, 3H). LC-MS (ESI):  
106 *m/z* 375.1 (M - H)<sup>-</sup>.

107 *N*-(4-(*N*-(bicyclo[2.2.1]heptan-2-yl)sulfamoyl)phenyl)acetamide (**15**). Yield: 63%. <sup>1</sup>H NMR (400  
108 MHz, DMSO-*d*<sub>6</sub>) δ 10.29 (s, 1H), 7.70-7.77 (m, 4H), 7.29 (d, *J* = 7.2 Hz, 1H), 2.91-2.96 (m, 1H),  
109 2.09 (s, 3H), 1.92-1.93 (m, 1H), 0.99-1.45 (m, 9H). LC-MS (ESI): *m/z* 309.0 (M + H)<sup>+</sup>.

110 *N*-(4-(*N*-(cyclohexylmethyl)sulfamoyl)phenyl)acetamide (**16**). Yield: 38%. <sup>1</sup>H NMR (400 MHz,  
111 DMSO-*d*<sub>6</sub>) δ 6.94-6.99 (m, 4H), 1.85-1.86 (m, 2H), 1.36 (s, 3H), 0.90-0.92 (m, 5H), 0.34-0.58  
112 (m, 6H). LC-MS (ESI): *m/z* 311.2 (M + H)<sup>+</sup>.

113 *N*-(4-(morpholinosulfonyl)phenyl)acetamide (**17**). Yield: 33%. <sup>1</sup>H NMR (400 MHz, DMSO-*d*<sub>6</sub>) δ  
114 10.40 (s, 1H), 7.83-7.85 (m, 2H), 7.67-7.69 (m, 2H), 3.63 (t, *J* = 4.8 Hz, 4H), 2.84 (t, *J* = 4.8 Hz,  
115 4H), 2.11 (s, 3H). LC-MS (ESI): *m/z* 285.0 (M + H)<sup>+</sup>.

116 *N*-(4-(*N*-cyclohexylsulfamoyl)phenyl)acetamide (**18**). Yield: 45%. <sup>1</sup>H NMR (400 MHz, DMSO-  
117 *d*<sub>6</sub>) δ 10.29 (s, 1H), 7.71-7.76 (m, 4H), 7.49 (d, *J* = 7.2 Hz, 1H), 2.88-2.89 (m, 1H), 2.09 (s, 3H),  
118 1.43-1.56 (m, 5H), 1.03-1.12 (m, 5H). LC-MS (ESI): *m/z* 297.2 (M + H)<sup>+</sup>.

119 *N*-(4-(*N*-(piperidin-1-yl)sulfamoyl)phenyl)acetamide (**19**). Yield: 36%. <sup>1</sup>H NMR (400 MHz,  
120 DMSO-*d*<sub>6</sub>) δ 7.04-7.06 (m, 2H), 6.95-6.97 (m, 2H), 1.71 (t, *J* = 5.2 Hz, 4H), 1.38 (s, 3H), 0.65-  
121 0.71 (m, 4H), 0.50-0.52 (m, 2H). LC-MS (ESI): *m/z* 298.0 (M + H)<sup>+</sup>.

122 *N*-(4-(*N*-cyclopentylsulfamoyl)phenyl)acetamide (**20**). Yield: 57%. <sup>1</sup>H NMR (400 MHz, DMSO-  
123 *d*<sub>6</sub>) δ 10.35 (s, 1H), 7.80-7.82 (m, 2H), 7.26-7.75 (m, 2H), 3.11 (t, *J* = 6.4 Hz, 4H), 2.10 (s, 3H),  
124 1.62-1.65 (m, 4H). LC-MS (ESI): *m/z* 269.0 (M + H)<sup>+</sup>.

125 *N*-(4-(*N*-(2-hydroxyethyl)sulfamoyl)phenyl)acetamide (**21**). Yield: 5.8%. <sup>1</sup>H NMR (400 MHz,  
126 DMSO-*d*<sub>6</sub>) δ 10.30 (bs, 1H), 7.69-7.76 (m, 4H), 3.35 (t, *J* = 6.4 Hz, 2H), 2.76 (t, *J* = 6.4 Hz, 2H),  
127 2.09 (s, 3H). LC-MS (ESI): *m/z* 259.1 (M + H)<sup>+</sup>.

128 Methyl (*S*)-2-((4-acetamidophenyl)sulfonamido)-2-phenylacetate (**23**). Yield: 52%. <sup>1</sup>H NMR  
129 (400 MHz, DMSO-*d*<sub>6</sub>): δ 10.27 (s, 1H), 8.77 (d, *J* = 9.6 Hz, 1H), 7.64-7.69 (m, 4H), 7.26-7.29  
130 (m, 5H), 4.99 (d, *J* = 9.6 Hz, 1H), 3.46 (s, 3H), 2.08 (s, 3H). HPLC-MS (ESI): *m/z* 363.0 (M+H)  
131 <sup>+</sup>.

132 4-Isopropyl-2-oxo-2H-chromen-7-yl butane-1-sulfonate (**24**). Yield: 34%. <sup>1</sup>H NMR (400 MHz,  
133 DMSO-*d*<sub>6</sub>): δ 8.02 (d, *J* = 8.8 Hz, 1H), 7.46 (d, *J* = 2.4 Hz, 1H), 7.34-7.37 (m, 1H), 6.38 (s, 1H),  
134 3.63 (t, *J* = 7.6 Hz, 2H), 3.37-3.41 (m, 1H), 1.79-1.86 (m, 2H), 1.45-1.49 (m, 2H), 1.27 (d, *J* =  
135 6.8 Hz, 6H), 0.94-0.95 (m, 3H). HPLC-MS (ESI): *m/z* 325.0 (M+H)<sup>+</sup>.

136 4-Isopropyl-2-oxo-2H-chromen-7-yl phenylmethanesulfonate (**25**). Yield: 17%. <sup>1</sup>H NMR (400  
137 MHz, DMSO-*d*<sub>6</sub>): δ 7.99 (d, *J* = 9.2 Hz, 1H), 7.43-7.52 (m, 5H), 7.32 (d, *J* = 2.4 Hz, 1H), 7.24-  
138 7.27 (m, 1H), 6.38 (s, 1H), 5.09 (s, 2H), 3.37-3.41 (m, 1H), 1.27 (d, *J* = 6.8 Hz, 6H). HPLC-MS  
139 (ESI): *m/z* 359.0 (M+H)<sup>+</sup>.

140 4-Isopropyl-2-oxo-2H-chromen-7-yl 4-fluorobenzenesulfonate (**26**). Yield: 25%. <sup>1</sup>H NMR (400  
141 MHz, DMSO-*d*<sub>6</sub>): δ 8.01-8.05 (m, 2H), 7.95 (d, *J* = 8.8 Hz, 1H), 7.53-7.57 (m, 2H), 7.21 (d, *J* =  
142 2.4 Hz, 1H), 7.08-7.10 (m, 1H), 6.37 (s, 1H), 3.29-3.39 (m, 1H), 1.24 (d, *J* = 6.8 Hz, 6H). HPLC-  
143 MS (ESI): *m/z* 363.0 (M+H)<sup>+</sup>.

144 4-Isopropyl-2-oxo-2H-chromen-7-yl 4-methylbenzenesulfonate (**27**). Yield: 36%. <sup>1</sup>H NMR (400  
145 MHz, DMSO-*d*<sub>6</sub>): δ 7.93 (d, *J* = 8.8 Hz, 1H), 7.80-7.83 (m, 2H), 7.47-7.52 (m, 2H), 7.06-7.15

146 (m, 2H), 6.35 (s, 1H), 3.30-3.37 (m, 1H), 2.44 (s, 3H), 1.23 (d,  $J = 6.8$  Hz, 6H). HPLC-MS (ESI):  
147  $m/z$  358.9 (M+H)<sup>+</sup>.

148 4-Isopropyl-2-oxo-2H-chromen-7-yl 4-methoxybenzenesulfonate (**28**). Yield: 43%. <sup>1</sup>H NMR  
149 (400 MHz, DMSO-*d*6):  $\delta$  7.93 (d,  $J = 8.8$  Hz, 1H), 7.84-7.87 (m, 2H), 7.18-7.21 (m, 2H), 7.05-  
150 7.14 (m, 2H), 6.35 (s, 1H), 3.88 (s, 3H), 3.31-3.37 (m, 1H), 1.23 (d,  $J = 6.8$  Hz, 6H). HPLC-MS  
151 (ESI):  $m/z$  375.0 (M+H)<sup>+</sup>.

152 4-Isopropyl-2-oxo-2H-chromen-7-yl 4-chlorobenzenesulfonate (**29**). Yield: 40%. <sup>1</sup>H NMR (400  
153 MHz, DMSO-*d*6):  $\delta$  7.93-7.96 (m, 3H), 7.77-7.80 (m, 2H), 7.22 (d,  $J = 2.4$  Hz, 1H), 7.08-7.11  
154 (m, 1H), 6.37 (s, 1H), 3.33-3.36 (m, 1H), 1.24 (d,  $J = 6.8$  Hz, 6H). HPLC-MS (ESI):  $m/z$  378.9  
155 (M+H)<sup>+</sup>.

156 4-Isopropyl-2-oxo-2H-chromen-7-yl 4-isopropylbenzenesulfonate (**30**). Yield: 35%. <sup>1</sup>H NMR  
157 (400 MHz, DMSO-*d*6):  $\delta$  7.94 (d,  $J = 8.8$  Hz, 1H), 7.85-7.87 (m, 2H), 7.57-7.59 (m, 2H), 7.14 (d,  
158  $J = 2.8$  Hz, 1H), 7.08-7.11 (m, 1H), 6.35 (s, 1H), 3.31-3.37 (m, 1H), 3.01-3.08 (m, 1H), 1.22-  
159 1.24 (m, 12H). HPLC-MS (ESI):  $m/z$  387.0 (M+H)<sup>+</sup>.

160 4-(((4-Isopropyl-2-oxo-2H-chromen-7-yl)oxy)sulfonyl)benzoic acid (**31**). Yield: 21%. <sup>1</sup>H NMR  
161 (400 MHz, DMSO-*d*6):  $\delta$  8.12-8.14 (m, 2H), 8.01 (d,  $J = 8.8$  Hz, 1H), 7.81-7.84 (m, 2H), 7.51 (d,  
162  $J = 2.4$  Hz, 1H), 7.38-7.41 (m, 1H), 6.36 (s, 1H), 3.40-3.45 (m, 1H), 1.29 (d,  $J = 6.8$  Hz, 6H).  
163 HPLC-MS (ESI):  $m/z$  389.0 (M+H)<sup>+</sup>.

164 *N*-cyclohexyl-1-phenylmethanesulfonamide (**32**). Yield: 40%. <sup>1</sup>H NMR (400 MHz, DMSO-*d*6):  
165  $\delta$  7.32-7.40 (m, 5H), 7.03 (s, 1H), 4.29 (s, 2H), 2.98-2.99 (m, 1H), 1.49-1.82 (m, 5H), 1.06-1.24  
166 (m, 5H). HPLC-MS (ESI):  $m/z$  254.2 (M+H)<sup>+</sup>.



167 *N*-cyclohexyl-4-fluorobenzenesulfonamide (**33**). Yield: 33%. <sup>1</sup>H NMR (400 MHz, DMSO-*d*<sub>6</sub>): δ  
168 7.85-7.87 (m, 2H), 7.68 (s, 1H), 7.39-7.45 (m, 2H), 2.92-2.95 (m, 1H), 1.43-1.58 (m, 5H), 1.02-  
169 1.19 (m, 5H). HPLC-MS (ESI): *m/z* 258.0 (M+H)<sup>+</sup>.

170 *N*-cyclohexyl-4-methylbenzenesulfonamide (**34**). Yield: 44%. <sup>1</sup>H NMR (400 MHz, DMSO-*d*<sub>6</sub>):  
171 δ 7.69 (d, *J* = 8.4 Hz, 2H), 7.54 (s, 1H), 7.38 (d, *J* = 8.0 Hz, 2H), 2.89-2.92 (m, 1H), 2.39 (s, 3H),  
172 1.43-1.58 (m, 5H), 1.01-1.16 (m, 5H). HPLC-MS (ESI): *m/z* 253.9 (M+H)<sup>+</sup>.

173 4-Chloro-*N*-cyclohexylbenzenesulfonamide (**35**). Yield: 64%. <sup>1</sup>H NMR (400 MHz, DMSO-*d*<sub>6</sub>):  
174 δ 7.80-7.81 (m, 2H), 7.74 (s, 1H), 7.64-7.68 (m, 2H), 2.93-2.97 (m, 1H), 1.44-1.58 (m, 5H), 1.04-  
175 1.19 (m, 5H). HPLC-MS (ESI): *m/z* 274.0 (M+H)<sup>+</sup>.

176 *N*-cyclohexyl-4-methoxybenzenesulfonamide (**36**). Yield: 33%. <sup>1</sup>H NMR (400 MHz, DMSO-*d*<sub>6</sub>):  
177 δ 7.72-7.76 (m, 2H), 7.46 (d, *J* = 7.2 Hz, 1H), 7.08-7.12 (m, 2H), 3.84 (s, 3H), 2.87-2.88 (m, 1H),  
178 1.43-1.58 (m, 5H), 1.08-1.20 (m, 5H). HPLC-MS (ESI): *m/z* 270.0 (M+H)<sup>+</sup>.

179 *N*-cyclohexyl-4-isopropylbenzenesulfonamide (**37**). Yield: 36%. <sup>1</sup>H NMR (400 MHz, DMSO-  
180 *d*<sub>6</sub>): δ 7.73 (d, *J* = 8.0 Hz, 2H), 7.55 (d, *J* = 7.2 Hz, 1H), 7.45 (d, *J* = 8.0 Hz, 2H), 2.93-3.01 (m,  
181 2H), 1.36-1.58 (m, 5H), 1.23 (d, *J* = 6.8 Hz, 6H), 1.04-1.18 (m, 5H). HPLC-MS (ESI): *m/z* 282.0  
182 (M+H)<sup>+</sup>.

183 *N*-cyclohexyl-4-(dimethylamino)benzenesulfonamide (**38**). Yield: 6.8%. <sup>1</sup>H NMR (400 MHz,  
184 DMSO-*d*<sub>6</sub>): δ 7.74 (d, *J* = 9.2 Hz, 2H), 6.68 (d, *J* = 8.8 Hz, 2H), 2.97 (s, 6H), 2.63-2.68 (m, 1H),  
185 1.54-1.79 (m, 5H), 1.06-1.27 (m, 5H). HPLC-MS (ESI): *m/z* 283.1 (M+H)<sup>+</sup>.

186 4-(*N*-cyclohexylsulfamoyl)benzoic acid (**39**). Yield: 65%. <sup>1</sup>H NMR (400 MHz, DMSO-*d*<sub>6</sub>): δ  
187 7.94 (d, *J* = 8.4 Hz, 2H), 7.68 (d, *J* = 8.4 Hz, 2H), 7.51 (bs, 1H), 2.90-2.91 (m, 1H), 1.42-1.55 (m,  
188 5H), 0.99-1.11 (m, 5H). HPLC-MS (ESI): *m/z* 284.0 (M+H)<sup>+</sup>.

189 4-Isopropyl-2-oxo-2H-chromen-7-yl 4-acetamidobenzoate (**41**). Yield: 81%. <sup>1</sup>H NMR (400 MHz,  
190 DMSO-*d*<sub>6</sub>): δ 10.41 (s, 1H), 8.11 (d, *J* = 8.8 Hz, 2H), 8.00 (d, *J* = 8.4 Hz, 1H), 7.82 (d, *J* = 8.8  
191 Hz, 2H), 7.47 (d, *J* = 2.4 Hz, 1H), 7.34-7.36 (m, 1H), 6.36 (s, 1H), 3.41-3.46 (m, 1H), 2.12 (s,  
192 3H), 1.29 (d, *J* = 6.8 Hz, 6H). HPLC-MS (ESI): *m/z* 366.0 (M+H)<sup>+</sup>.

193 **CFSE assay.** Prior to culture, cKit-enriched BM cells ( $1 \times 10^6$ /mL) were labeled with 5- (and 6-)  
194 carboxy-fluorescein diacetatesuccinimidylester (CFSE) dye (3 μM, Molecular Probes) in PBS  
195 supplemented with 0.1% bovine serum albumin. Labeling was performed in the dark at 37 °C for  
196 10 min. Labeling was stopped by the addition of 5 volumes of ice cold PBS. 4 days after culture  
197 with cytokine plus compound, labeled cells were harvested and stained with the antibody  
198 cocktail for lineage markers, Sca-1, CD48, and CD150. During cell division, CFSE is distributed  
199 equally between daughter cells so that the generation of cells could be reflected by the content of  
200 CFSE and measured by the intensity of fluorescence. The CyAnsystem (DakoCytomation) was  
201 used for data acquisition. The data was analyzed using cells/Proliferation module of FlowJo  
202 software (Treestar, Inc.), which would fit a curve of the input data, automatically generate peaks  
203 standing for subpopulations with different fluorescence intensity and calculate the percentage of  
204 each peak and divided statistics results. Each peak represents one generation of cells. The  
205 original cells have the most intense fluorescence signal and emerge in the rightmost side of the  
206 X-axis. Upon cell division, the CFSE divides between daughter cells and the peak shifts left.  
207 While the Y-axis represents cell counts, the peak height represents the number of cells in each

208 generation. For our results, the four peaks represent four cell generations (first, second, third and  
209 fourth cell generations) going from the right to the left of the X-axis.

210

211

212

213

214 **References:**

- 215 1. Xie, L., Takeuchi, Y., Cosentino, L.M., McPhail, A.T. & Lee, K.H. Anti-AIDS agents. 42.  
216 Synthesis and anti-HIV activity of disubstituted (3'R,4'R)-3',4'-di-O-(S)-camphanoyl-(+)-  
217 cis-khellactone analogues. *J Med Chem* **44**, 664-71 (2001).

218

219

220

221

222

223

224

225

226

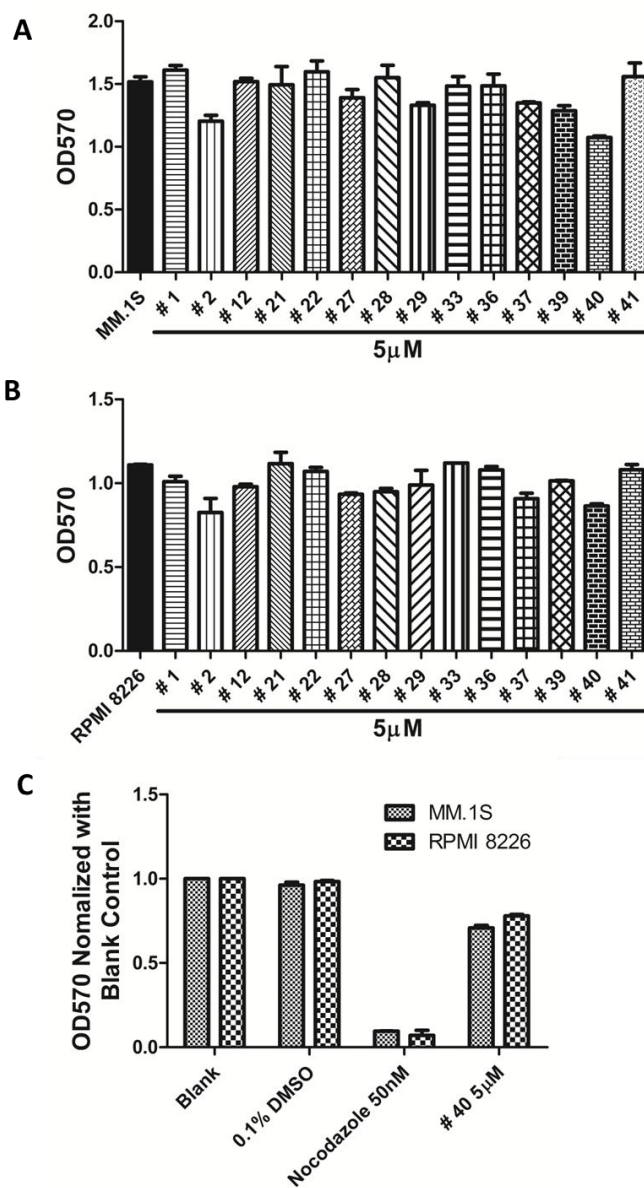

227

228 **Figure S1. Cytotoxic effect of top compounds on myeloma cell lines.** (A, B) MM.1S cells and  
 229 RPMI 8226 cells ( $2 \times 10^4$  cells/well) were plated on 96-well plates. Cells were incubated with  
 230 the indicated doses of compounds for 48 h. The percentage of cell survival was determined using  
 231 the MTT assay. The data are the mean  $\pm$  SEM of all experiments conducted in triplicate. (C)  
 232 Cytotoxic effect of compound **40** and positive control Nocodazole on myeloma cell lines.

233

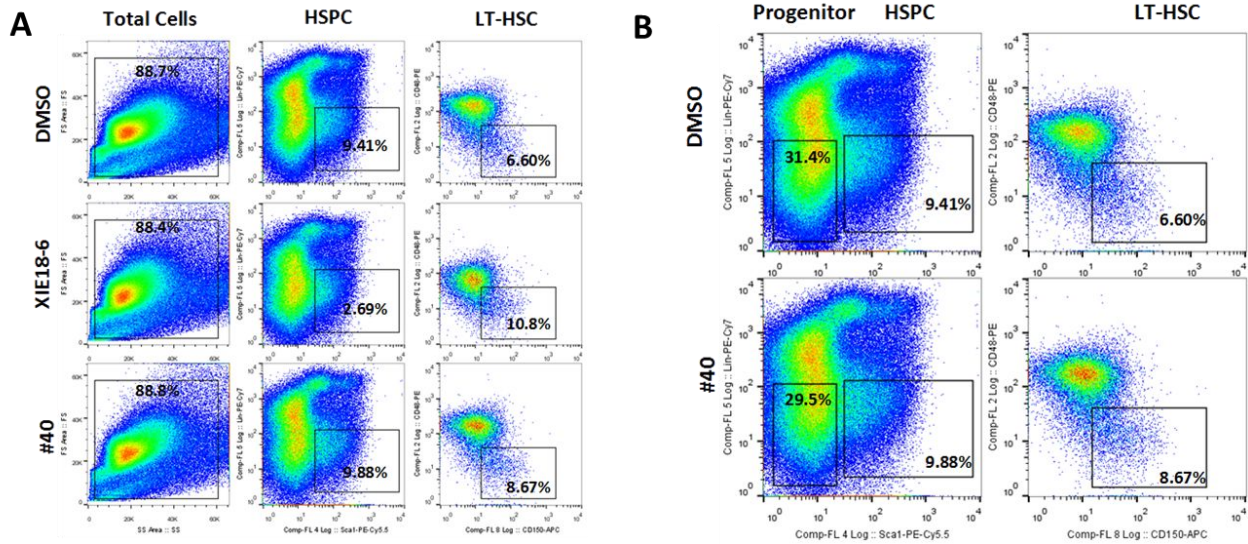

234  
235

236 **Figure S2.**

237 **Separation of hematopoietic stem / progenitor populations by flow cytometry.** Gating  
238 scheme for the progenitor cells (Lin<sup>-</sup>Sca1<sup>-</sup>), HSPCs (Lin<sup>-</sup>Sca1<sup>+</sup>), and LT-HSCs (Lin<sup>-</sup>Sca1<sup>+</sup>CD48<sup>-</sup>  
239 CD150<sup>+</sup>) populations.

240

241

242

243

244

245

246

The general synthesis route for sulfonamide analogues

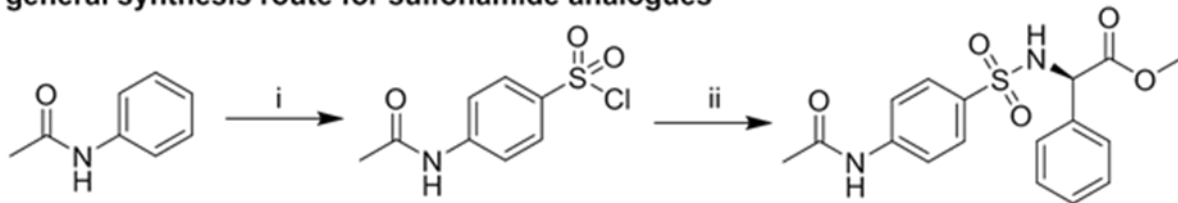

247

248 **Figure S3. The general chemistry synthesis route for sulfonamide analogues.** Reagents and

249 conditions are as follows: i) HSO<sub>3</sub>Cl, 60 °C; ii) K<sub>2</sub>CO<sub>3</sub>, H<sub>2</sub>O, r.t, 12.

250

**A**

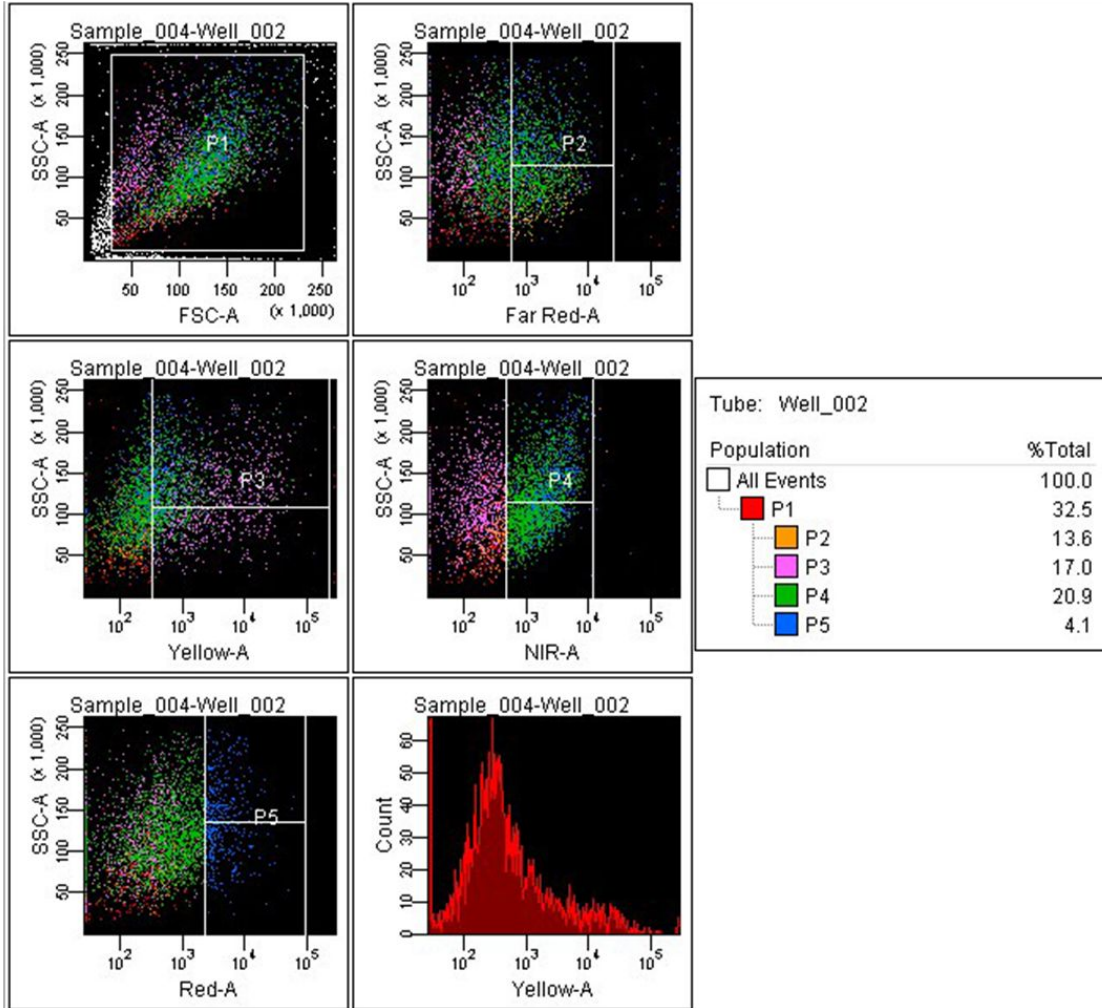

251

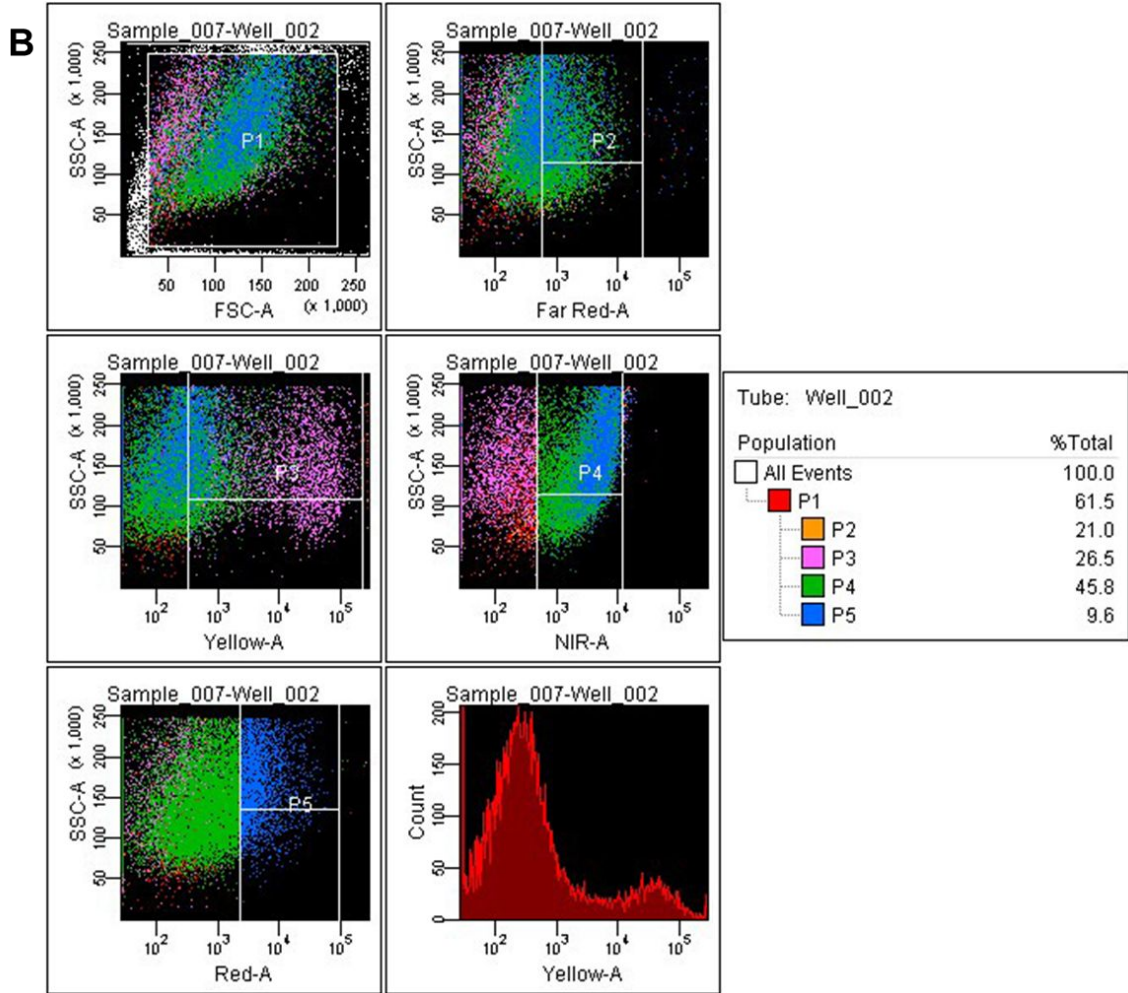

252



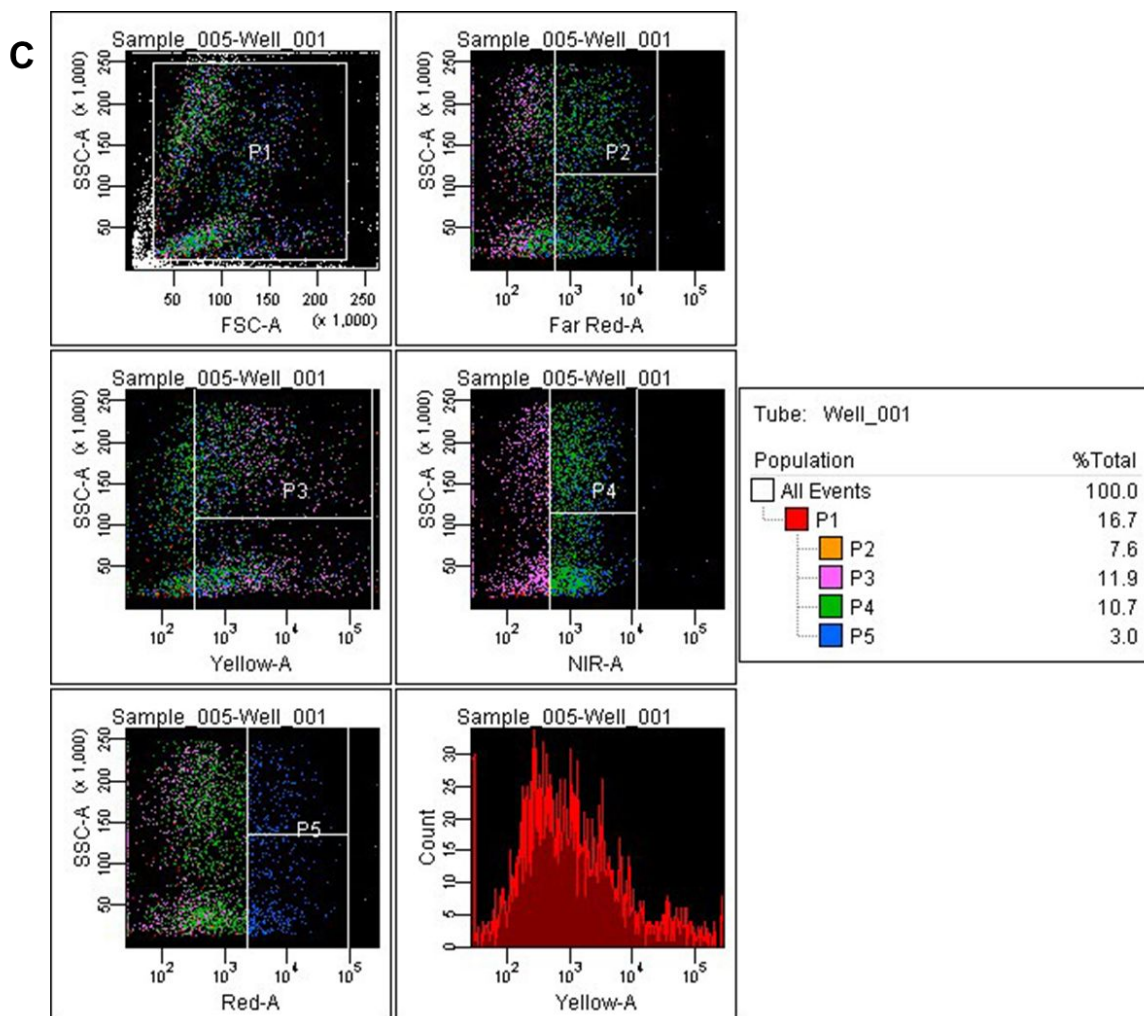

253

254 **Figure S4.** Representative flow cytometry plot figures of single cell colony assay in XIE18-6  
 255 (A), compound **40** (B) and control (C) groups, respectively. The matchup of parameters for each  
 256 laser and fluorescence dye is as following: Far Red-Percp-cy5.5-Gr-1, Near Infrared (NIR) -  
 257 APC-cy7-Mac-1, Red-APC-Ter119, Yellow-PE-CD41. Four lineage-positive wells were  
 258 determined by the percentage of P2, P3 and P4 being greater than 5% and the percentage of P5  
 259 being greater than 3%.

260

**A**

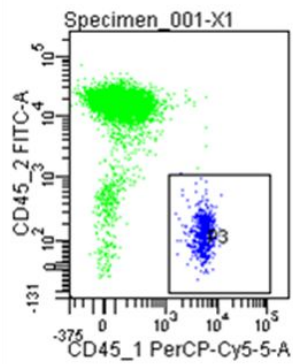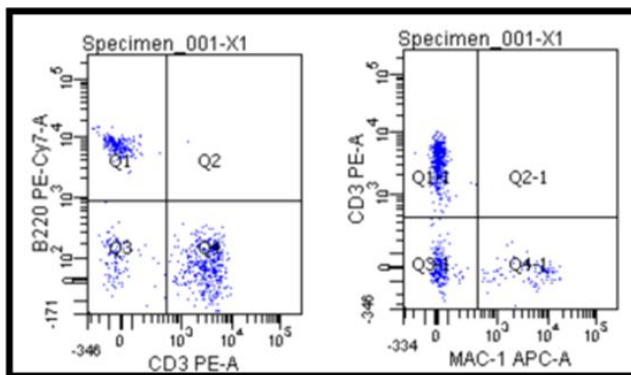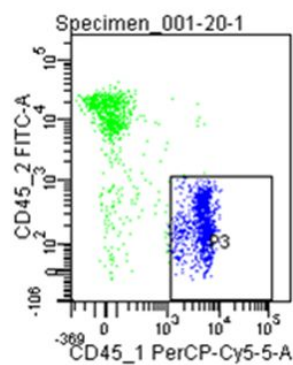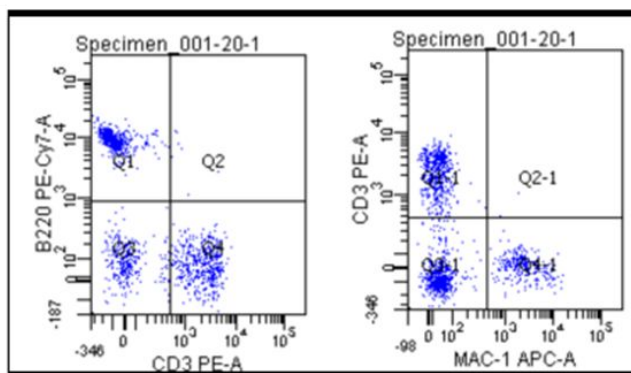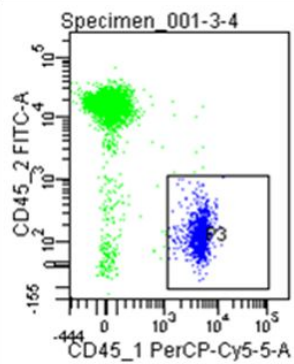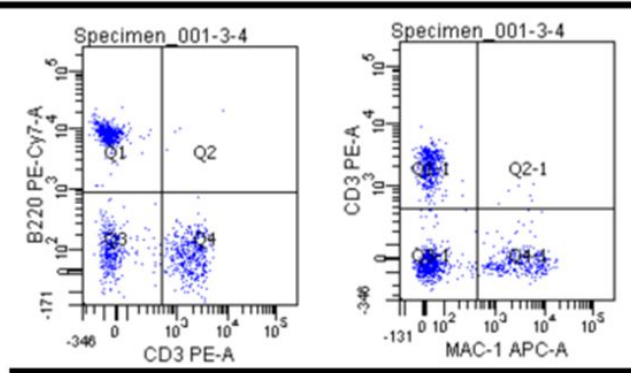

**B**

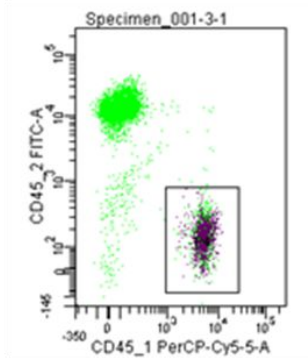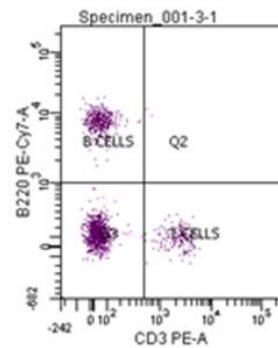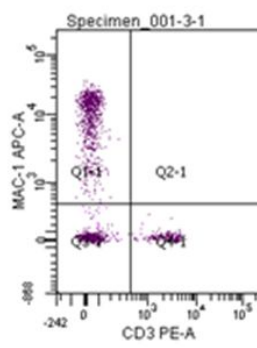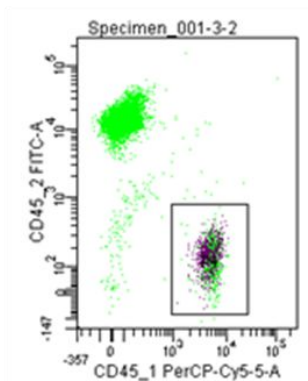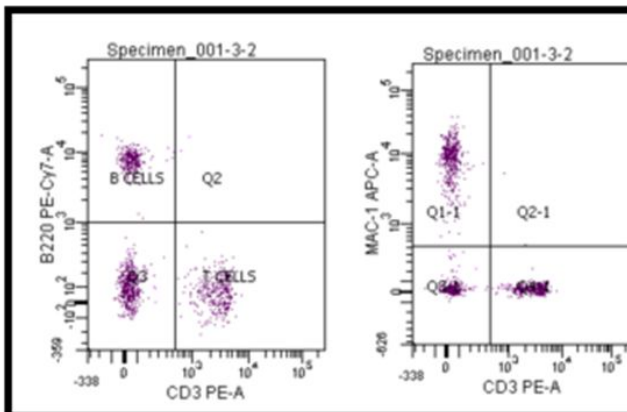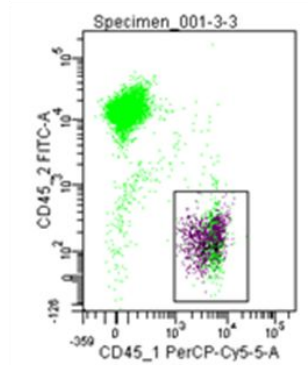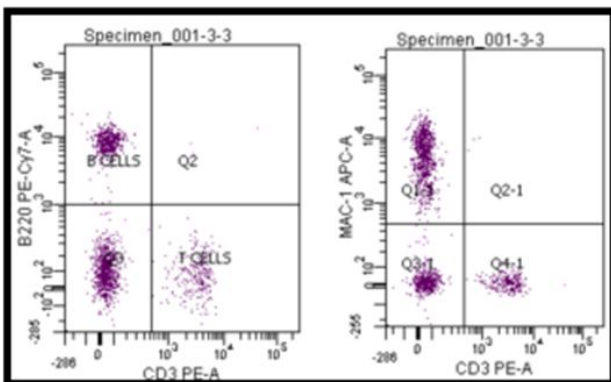

C

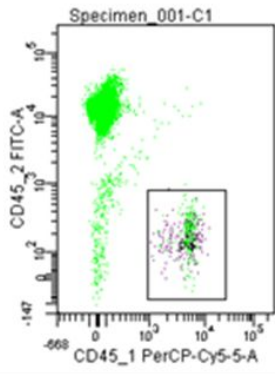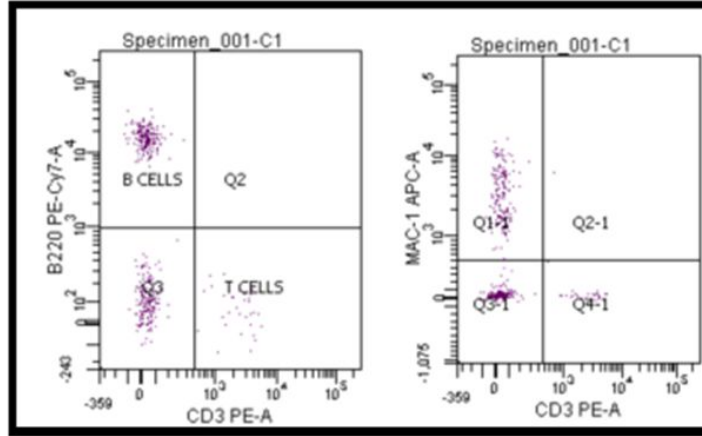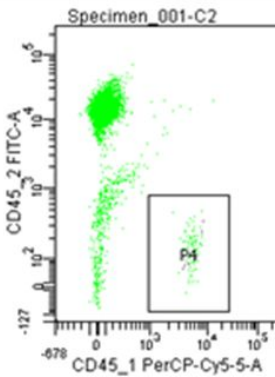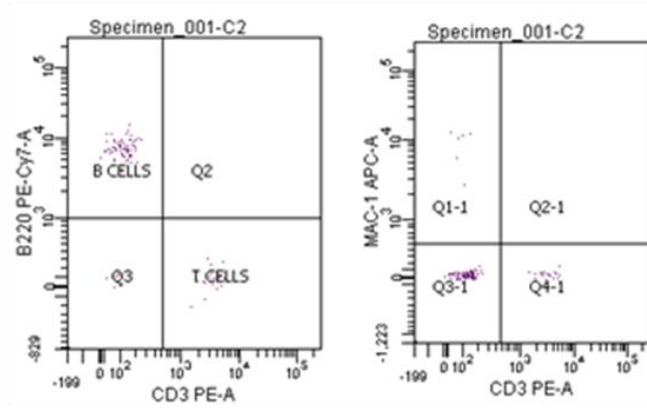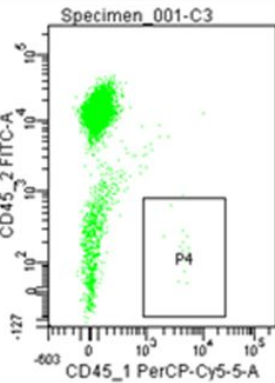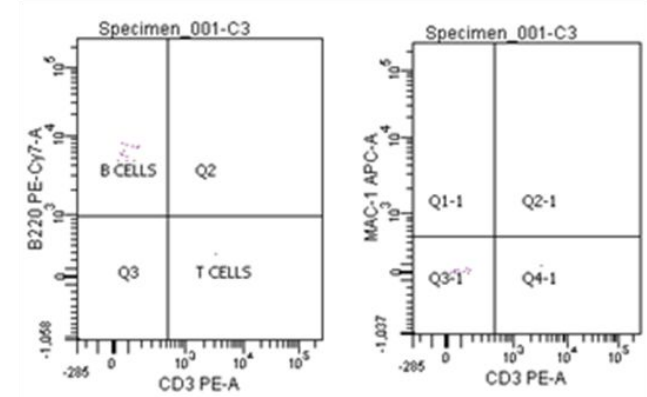

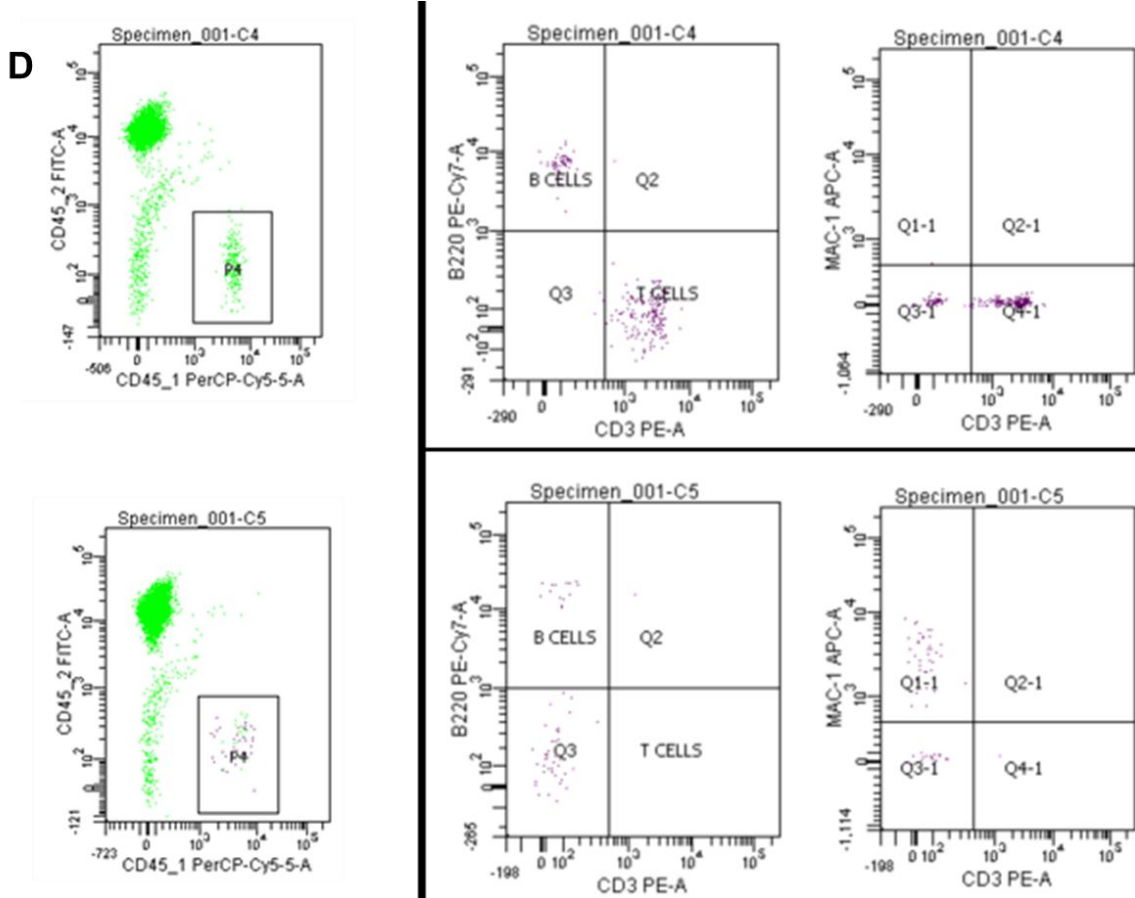

264

265 **Figure S5.** Representative flow plots of donor chimerism and lineage differentiation distribution  
 266 in recipient bone marrow for compound **40** (A), XIE18-6 (B), DMSO-control (C) and no culture-  
 267 control (D) groups.

268

269

270

271

272

273

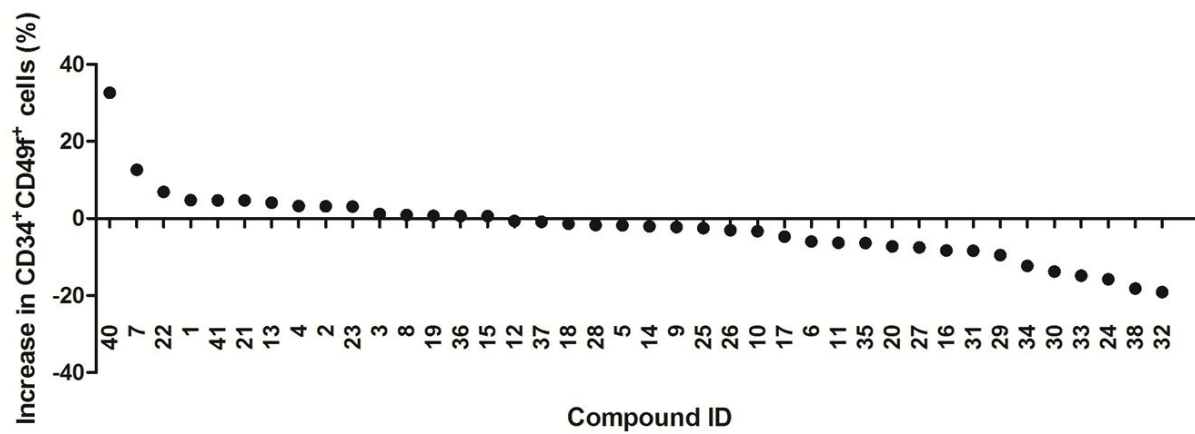

274

275 **Figure S6. Primary screening hit identification of p18SMIs prompting expansion *ex vivo* of**  
 276 **human hematopoietic stem cells.**

277

278

279

280

281

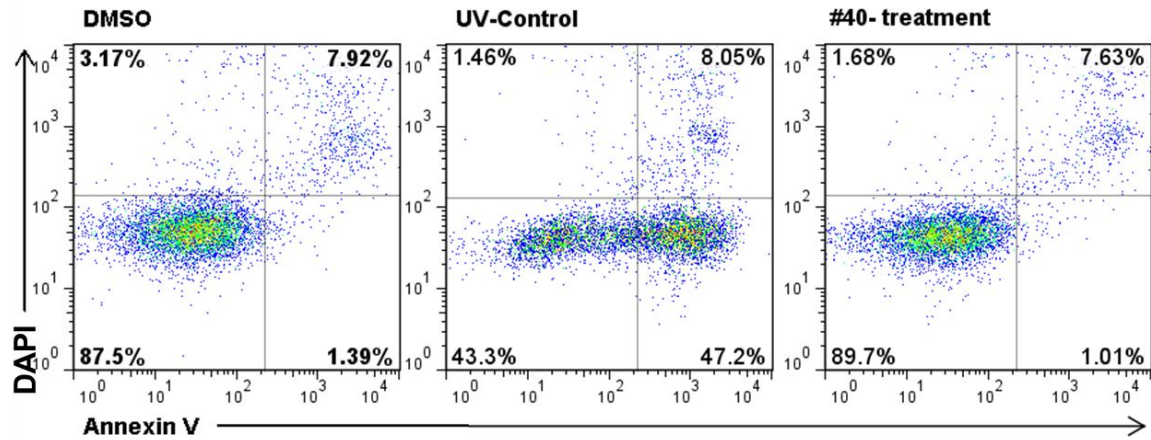

282

283 **Figure S7.** Representative figures of apoptosis of cultured c-Kit enriched BM cells which were  
 284 cultured with cytokine plus 20  $\mu$ M compound **40** or DMSO for 5 days. Uncultured bone marrow  
 285 cells were irradiated by UV to serve as positive control. Apoptosis was checked by Annexin V  
 286 staining on hematopoietic cells.

287

288

289

290



291 **Table S1.** Structure and activity to promote the expansion of HSCs for compounds XIE18-6, **1**  
292 and **2**

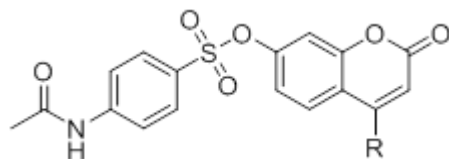

| Compd. No. | Structure (-R)     | ED <sub>50</sub> , μM <sup>a, b</sup> | SD      |
|------------|--------------------|---------------------------------------|---------|
| XIE18-6    | CH <sub>3</sub>    | 0.10546                               | 0.00361 |
| <b>1</b>   | H                  | 0.09686                               | 0.00216 |
| <b>2</b>   | <i>iso</i> -propyl | 0.0610                                | 0.00136 |

294

295 <sup>a</sup>The activity to promote the expansion of HSCs were evaluated using single hematopoietic stem  
296 cell *in vitro* culture assay. <sup>b</sup>The activity of lead compound XIE18-6 was evaluated in parallel  
297 with compounds **1** and **2** under the same conditions. Data are mean ± SD of all experiments of  
298 two or more performed in duplicate or triplicate.

299

300

301

302

303



304 **Table S2.** Structure and activity to promote the expansion of HSCs for compounds **3 – 14**

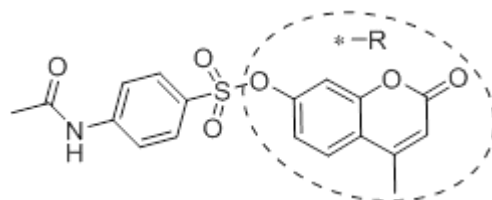

305

| Compd. No.     | Structure (-R) | ED <sub>50</sub> , μM <sup>a, b</sup> | SD      |
|----------------|----------------|---------------------------------------|---------|
| <b>3</b>       |                | 18.66                                 | 1.61    |
| <b>4</b>       |                | 7.76                                  | 0.14    |
| <b>5</b>       |                | 8.56                                  | 0.52    |
| <b>6</b>       |                | 9.3                                   | 0.17    |
| <b>7</b>       |                | 16.4                                  | 0.09    |
| <b>8</b>       |                | 1.55                                  | 0.15    |
| <b>9</b>       |                | 5.37                                  | 0.71    |
| <b>10</b>      |                | 7.91                                  | 0.37    |
| <b>11</b>      |                | 2.82                                  | 0.09    |
| <b>12</b>      |                | 0.0259                                | 0.00037 |
| <b>13</b>      |                | 4.16                                  | 0.39    |
| <b>14</b>      |                | 10.16                                 | 0.06    |
| <b>XIE18-6</b> |                | 0.10546                               | 0.00361 |

306 <sup>a</sup>The activity to promote the expansion of HSCs were evaluated using single hematopoietic stem  
 307 cell *in vitro* culture assay. <sup>b</sup>The activity of lead compound XIE18-6 was evaluated in parallel  
 308 with compounds **3 – 14** under the same conditions. Data are mean ± SD of all experiments of  
 309 two or more performed in duplicate or triplicate.

310 **Table S3.** Structure and activity to promote the expansion of HSCs for compounds 15 – 21

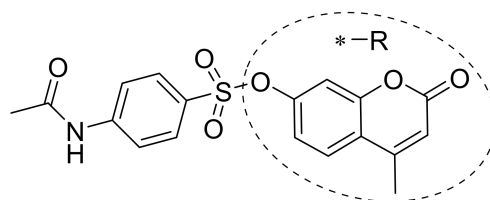

311

| Compd. No.     | Structure (-R) | ED <sub>50</sub> , μM <sup>a, b</sup> | SD      |
|----------------|----------------|---------------------------------------|---------|
| <b>15</b>      |                | 22.57                                 | 0.13    |
| <b>16</b>      |                | 7.03                                  | 0.24    |
| <b>17</b>      |                | 9.64                                  | 0.10    |
| <b>18</b>      |                | 19.52                                 | 1.41    |
| <b>19</b>      |                | 3.22                                  | 0.06    |
| <b>20</b>      |                | 10.36                                 | 0.40    |
| <b>21</b>      |                | 0.0107                                | 0.00081 |
| <b>XIE18-6</b> |                | 0.10546                               | 0.00361 |

312 <sup>a</sup>The activity to promote the expansion of HSCs were evaluated using single hematopoietic stem  
 313 cell *in vitro* culture assay. <sup>b</sup>The activity of lead compound XIE18-6 was evaluated in parallel  
 314 with compounds **15 – 21** under the same conditions. Data are mean ± SD of all experiments of  
 315 two or more performed in duplicate or triplicate.

316

317

318

319 **Table S4.** Structure and activity to promote the expansion of HSCs for compounds **22** and **23**



320

| Compd. No.     | Structure (-R) | ED <sub>50</sub> , μM <sup>a, b</sup> | SD      |
|----------------|----------------|---------------------------------------|---------|
| <b>22</b>      |                | 0.00729                               | 0.00074 |
| <b>23</b>      |                | 21.3                                  | 1.10    |
| <b>XIE18-6</b> |                | 0.10546                               | 0.00361 |

321 <sup>a</sup>The activity to promote the expansion of HSCs were evaluated using single hematopoietic stem  
 322 cell *in vitro* culture assay. <sup>b</sup>The activity of lead compound XIE18-6 was evaluated in parallel  
 323 with compounds **22** and **23** under the same conditions. Data are mean ± SD of all experiments of  
 324 two or more performed in duplicate or triplicate.

325

326

327

328

329

330

331 **Table S5.** Structure and activity to promote the expansion of HSCs for compounds **24 – 31**

332

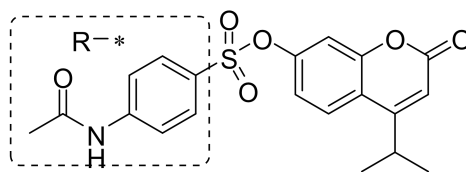

| Compd. No.     | Structure (-R) | ED <sub>50</sub> , μM <sup>a, b</sup> | SD      |
|----------------|----------------|---------------------------------------|---------|
| <b>24</b>      |                | 4.14                                  | 0.05    |
| <b>25</b>      |                | 0.92                                  | 0.01    |
| <b>26</b>      |                | 0.79                                  | 0.04    |
| <b>27</b>      |                | 0.02087                               | 0.00091 |
| <b>28</b>      |                | 0.0595                                | 0.00208 |
| <b>29</b>      |                | 0.07822                               | 0.00231 |
| <b>30</b>      |                | 1.93                                  | 0.04    |
| <b>31</b>      |                | 6.72                                  | 0.36    |
| <b>XIE18-6</b> |                | 0.10546                               | 0.00361 |

333 <sup>a</sup>The activity to promote the expansion of HSCs were evaluated using single hematopoietic stem  
 334 cell *in vitro* culture assay. <sup>b</sup>The activity of lead compound XIE18-6 was evaluated in parallel  
 335 with compounds **15 – 21** under the same conditions. Data are mean ± SD of all experiments of  
 336 two or more performed in duplicate or triplicate.

337

338

339

340 **Table S6.** Structure and activity to promote the expansion of HSCs for compounds **32 – 40**

341

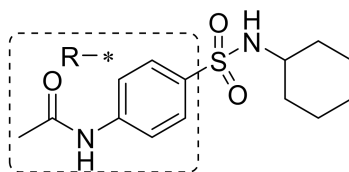

| Compd. No.     | Structure (-R) | ED <sub>50</sub> , μM <sup>a, b</sup> | SD      |
|----------------|----------------|---------------------------------------|---------|
| <b>32</b>      |                | 9.54                                  | 0.47    |
| <b>33</b>      |                | 0.01967                               | 0.00033 |
| <b>34</b>      |                | 10.33                                 | 0.90    |
| <b>35</b>      |                | 9.46                                  | 0.38    |
| <b>36</b>      |                | 0.06283                               | 0.00015 |
| <b>37</b>      |                | 0.01005                               | 0.00134 |
| <b>38</b>      |                | 11.7                                  | 0.36    |
| <b>39</b>      |                | 0.120                                 | 0.00020 |
| <b>40</b>      |                | 0.00521                               | 0.00064 |
| <b>XIE18-6</b> |                | 0.10546                               | 0.00361 |

342 <sup>a</sup>The activity to promote the expansion of HSCs were evaluated using single hematopoietic stem  
 343 cell *in vitro* culture assay. <sup>b</sup>The activity of lead compound XIE18-6 was evaluated in parallel  
 344 with compounds **15 – 21** under the same conditions. Data are mean ± SD of all experiments of  
 345 two or more performed in duplicate or triplicate.

346

347

348 **Table S7.** Structure and activity to promote the expansion of HSCs for compound **41**

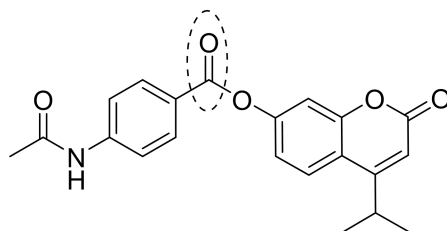

| Compd. No.     | ED <sub>50</sub> , μM <sup>a, b</sup> | SD      |
|----------------|---------------------------------------|---------|
| <b>41</b>      | 0.00992                               | 0.00071 |
| <b>XIE18-6</b> | 0.10546                               | 0.00361 |

350 <sup>a</sup>The activity to promote the expansion of HSCs were evaluated using single hematopoietic stem  
351 cell *in vitro* culture assay. <sup>b</sup>The activity of lead compound XIE18-6 was evaluated in parallel  
352 with compound **40** under the same conditions. Data are mean ± SD of all experiments of two or  
353 more performed in duplicate or triplicate.

354

355

356

357

358

359

360
